# Supplementary material for: Exploring variation in low-value care: a multilevel modelling study
Source: Springer Nature journal article supplement (doi:10.1186/s12913-019-4159-1), 2019-05-30
Supplement: MOESM3 [file 16761066]

### Additional file 3: Results for the broader definitions of low-value care

Supplementary Table 2: c statistics for Models 1 to 5, and change between models, broader definitions of low-value care

| Low-value procedure                                       | Model 1 | Model 2 (hospital)       | Model 3 (LHD)            | Model 4 (SLA)            | Model 5 (all 3 levels) |                     |                     |                     |
|-----------------------------------------------------------|---------|--------------------------|--------------------------|--------------------------|------------------------|---------------------|---------------------|---------------------|
|                                                           | c       | c<br>ΔM1 (95% CI)        | c<br>ΔM1 (95% CI)        | c<br>ΔM1 (95% CI)        | c                      | ΔM2                 | ΔM3                 | ΔM4                 |
| Sentinel lymph node biopsy for early melanoma             | 0.64    | 0.79<br>0.14 (0.14–0.15) | 0.73<br>0.09 (0.09–0.10) | 0.70<br>0.05 (0.04–0.06) | 0.81                   | 0.01<br>(0.01–0.02) | 0.06<br>(0.06–0.07) | 0.11<br>(0.10–0.12) |
| Carotid endarterectomy in asymptomatic high risk patients | 0.69    | 0.76<br>0.07 (0.06–0.07) | 0.75<br>0.06 (0.05–0.06) | 0.75<br>0.04 (0.03–0.05) | 0.77                   | 0.01<br>(0.00–0.02) | 0.02<br>(0.01–0.03) | 0.03<br>(0.02–0.04) |
| EVAR in asymptomatic high risk patients                   | 0.65    | 0.68<br>0.03 (0.03–0.04) | 0.67<br>0.03 (0.02–0.03) | 0.70<br>0.04 (0.03–0.05) | 0.72                   | 0.02<br>(0.02–0.03) | 0.03<br>(0.02–0.04) | 0.02<br>(0.01–0.03) |
| Knee arthroscopy for osteoarthritis                       | 0.80    | 0.86<br>0.05 (0.05–0.05) | 0.82<br>0.02 (0.02–0.02) | 0.82<br>0.02 (0.02–0.02) | 0.86                   | 0.00<br>(0.00–0.00) | 0.04<br>(0.04–0.04) | 0.04<br>(0.04–0.04) |
| ERCP without cholangitis or obstruction                   | 0.65    | 0.67<br>0.02 (0.01–0.02) | 0.67<br>0.01 (0.00–0.01) | 0.68<br>0.02 (0.01–0.03) | 0.70                   | 0.01<br>(0.00–0.02) | 0.02<br>(0.01–0.03) | 0.01<br>(0.00–0.03) |
| Abdominal hysterectomy                                    | 0.61    | 0.70<br>0.09 (0.09–0.10) | 0.66<br>0.06 (0.05–0.06) | 0.68<br>0.07 (0.06–0.07) | 0.71                   | 0.00<br>(0.00–0.00) | 0.04<br>(0.04–0.04) | 0.03<br>(0.03–0.03) |
| Spinal fusion for low back pain                           | 0.69    | 0.72<br>0.03 (0.03–0.03) | 0.72<br>0.03 (0.03–0.03) | 0.76<br>0.06 (0.06–0.07) | 0.78                   | 0.04<br>(0.04–0.05) | 0.05<br>(0.04–0.05) | 0.01<br>(0.01–0.02) |
| Colonoscopy for constipation in people < 50 years         | 0.63    | 0.76<br>0.13 (0.12–0.13) | 0.68<br>0.05 (0.05–0.05) | 0.70<br>0.07 (0.06–0.07) | 0.77                   | 0.01<br>(0.01–0.01) | 0.08<br>(0.08–0.09) | 0.07<br>(0.06–0.07) |
| Endoscopy for dyspepsia in people < 55                    | 0.63    | 0.78<br>0.15 (0.15–0.15) | 0.69<br>0.06 (0.06–0.06) | 0.73<br>0.09 (0.09–0.10) | 0.79                   | 0.00<br>(0.00–0.01) | 0.10<br>(0.10–0.10) | 0.06<br>(0.06–0.06) |

For details of the models, see Table 2. ERCP, endoscopic retrograde cholangiopancreatography. EVAR, endovascular repair of abdominal aortic aneurysm.

Supplementary Table 3: Variance parameters for Model 5 for each of the nine procedures, broader definitions of low-value care

| Parameter             | Sentinel lymph node biopsy for early melanoma | Carotid endarterectomy in asymptomatic high risk patients | EVAR in asymptomatic high risk patients | Knee arthroscopy for osteoarthritis | ERCP without cholangitis or obstruction | Abdominal hysterectomy | Spinal fusion for low back pain | Colonoscopy for constipation in people < 50 | Endoscopy for dyspepsia for people < 55 |
|-----------------------|-----------------------------------------------|-----------------------------------------------------------|-----------------------------------------|-------------------------------------|-----------------------------------------|------------------------|---------------------------------|---------------------------------------------|-----------------------------------------|
| <b>Hospital level</b> |                                               |                                                           |                                         |                                     |                                         |                        |                                 |                                             |                                         |
| Variance              | 1.7<br>(1.0–3.0)                              | 0.5<br>(0.2–1.1)                                          | 0.5<br>(0.2–1.1)                        | 2.2<br>(1.6–3.0)                    | 0.1<br>(0.1–0.3)                        | 0.5<br>(0.3–0.7)       | 0.7<br>(0.3–1.6)                | 0.9<br>(0.6–1.3)                            | 1.0<br>(0.7–1.4)                        |
| VPC                   | 31.2<br>(22.1–37.1)                           | 11.8<br>(4.9–19.0)                                        | 13.0<br>(6.1–24.1)                      | 36.4<br>(31.6–38.4)                 | 3.6<br>(1.8–6.5)                        | 12.5<br>(8.8–16.6)     | 16.5<br>(8.0–28.4)              | 20.4<br>(15.9–24.1)                         | 21.0<br>(17.8–23.2)                     |
| MOR                   | 3.5<br>(2.6–5.2)                              | 1.9<br>(1.5–2.7)                                          | 2.0<br>(1.6–2.8)                        | 4.1<br>(3.3–5.2)                    | 1.4<br>(1.3–1.6)                        | 1.9<br>(1.7–2.3)       | 2.3<br>(1.7–3.3)                | 2.5<br>(2.2–2.9)                            | 2.6<br>(2.3–3.1)                        |
| <b>LHD level</b>      |                                               |                                                           |                                         |                                     |                                         |                        |                                 |                                             |                                         |
| Variance              | 0.3<br>(0.0–1.5)                              | 0.3<br>(0.0–1.0)                                          |                                         | 0.4<br>(0.0–1.4)                    | 0.0<br>(0.0–0.1)                        | 0.1<br>(0.0–0.4)       |                                 | 0.1<br>(0.0–0.5)                            | 0.4<br>(0.1–1.1)                        |
| VPC                   | 5.6<br>(0.1–18.4)                             | 6.6<br>(0.2–18.5)                                         |                                         | 7.2<br>(0.7–18.1)                   | 0.7<br>(0.0–3.5)                        | 3.0<br>(0.3–8.5)       |                                 | 2.5<br>(0.0–9.7)                            | 8.1<br>(1.3–18.6)                       |
| MOR                   | 1.7<br>(1.1–3.2)                              | 1.6<br>(1.1–2.6)                                          |                                         | 1.9<br>(1.2–3.1)                    | 1.2<br>(1.0–1.4)                        | 1.4<br>(1.1–1.8)       |                                 | 1.4<br>(1.0–2.0)                            | 1.8<br>(1.2–2.7)                        |
| MOR (LHD+hospital)    | 3.9<br>(2.6–7.5)                              | 2.3<br>(1.5–4.0)                                          | 2.0<br>(1.6–2.8)                        | 4.7<br>(3.3–7.4)                    | 1.5<br>(1.3–1.8)                        | 2.1<br>(1.7–2.7)       | 2.3<br>(1.7–3.3)                | 2.6<br>(2.2–3.6)                            | 3.1<br>(2.3–4.5)                        |
| <b>SLA level</b>      |                                               |                                                           |                                         |                                     |                                         |                        |                                 |                                             |                                         |
| Variance              | 0.2<br>(0.1–0.3)                              | 0.1<br>(0.0–0.2)                                          | 0.2<br>(0.1–0.3)                        | 0.1<br>(0.1–0.1)                    | 0.1<br>(0.0–0.2)                        | 0.0<br>(0.0–0.0)       | 0.5<br>(0.4–0.6)                | 0.2<br>(0.1–0.2)                            | 0.1<br>(0.1–0.2)                        |
| VPC                   | 3.4<br>(2.5–3.6)                              | 1.7<br>(0.3–3.3)                                          | 4.8<br>(3.1–6.5)                        | 1.4<br>(1.2–1.4)                    | 3.0<br>(1.4–5.0)                        | 0.5<br>(0.2–0.7)       | 10.7<br>(9.1–11.6)              | 3.5<br>(2.8–4.1)                            | 2.3<br>(1.–2.5)                         |
| MOR                   | 1.5<br>(1.4–1.7)                              | 1.3<br>(1.1–1.5)                                          | 1.5<br>(1.4–1.7)                        | 1.3<br>(1.3–1.4)                    | 1.4<br>(1.2–1.5)                        | 1.1<br>(1.1–1.2)       | 1.9<br>(1.8–2.1)                | 1.5<br>(1.4–1.6)                            | 1.4<br>(1.3–1.4)                        |

Supplementary Table 4: Parameter estimates for Model 6 (full model) for the 9 low-value procedures, broader definitions of low-value care

| Variable                   | Statistic | Sentinel lymph node biopsy | Carotid endarterectomy  | EVAR                     | Knee arthroscopy         | ERCP                     | Abdominal hysterectomy  | Spinal fusion            | Colonoscopy             | Endoscopy               |
|----------------------------|-----------|----------------------------|-------------------------|--------------------------|--------------------------|--------------------------|-------------------------|--------------------------|-------------------------|-------------------------|
| <b>Episode level</b>       |           |                            |                         |                          |                          |                          |                         |                          |                         |                         |
| Age group*                 |           |                            |                         |                          |                          |                          |                         |                          |                         |                         |
| 1                          | OR        | 18–39: 0.6<br>(0.4–0.7)    | 18–74: 1.2<br>(0.8–1.7) | 18–74: 0.9<br>(0.7–1.2)  | 18–64: 4.0<br>(3.8–4.3)  | 18–39: 0.5<br>(0.4–0.6)  | 18–39: 0.7<br>(0.7–0.8) | 18–49: 0.5<br>(0.4–0.5)  | 18–29: 0.7<br>(0.6–0.8) | 18–24: 0.4<br>(0.4–0.4) |
| 2                          | OR        | 40–54: 0.9<br>(0.8–1.1)    | 75–79: 1                | 75–79: 1                 | 65–79: 1                 | 40–54: 0.6<br>(0.5–0.7)  | 40–49: 1                | 50–64: 1                 | 30–34: 0.7<br>(0.6–0.8) | 25–34: 0.5<br>(0.5–0.5) |
| 3                          | OR        | 55–69: 1                   | 80–84: 0.9<br>(0.8–1.2) | 80–84: 0.9<br>(0.8–1.0)  | 70–79: 0.5<br>(0.5–0.6)  | 55–69: 1                 | 50–59: 0.9<br>(0.8–0.9) | 65–79: 1.1<br>(1.0–1.2)  | 35–44: 1.0<br>(0.9–1.1) | 35–44: 0.8<br>(0.7–0.8) |
| 4                          | OR        | 70–100: 0.5<br>(0.4–0.6)   | 85–99: 0.5<br>(0.4–0.7) | 85–105: 0.4<br>(0.4–0.5) | 80–110: 0.2<br>(0.1–0.2) | 70–105: 1.6<br>(1.3–1.9) | 60–95: 0.3<br>(0.3–0.3) | 80–105: 0.3<br>(0.2–0.4) | 45–49: 1                | 45–54: 1                |
| Female                     | OR        | 0.6<br>(0.6–0.7)           | 0.7<br>(0.6–0.9)        | 0.6<br>(0.5–0.7)         | 0.8<br>(0.7–0.8)         | 0.9<br>(0.8–1.0)         |                         | 0.9<br>(0.8–1.0)         | 1.4<br>(1.3–1.5)        | 1.0<br>(0.9–1.0)        |
| Charlson comorbidity index |           |                            |                         |                          |                          |                          |                         |                          |                         |                         |
| 1                          | OR        | 0.9<br>(0.7–1.2)           | 0.4<br>(0.3–0.6)        | 0.7<br>(0.6–0.9)         | 0.5<br>(0.5–0.6)         | 0.7<br>(0.6–1.0)         | 1.1<br>(1.0–1.3)        | 0.8<br>(0.7–0.9)         | 0.5<br>(0.4–0.6)        | 0.5<br>(0.5–0.6)        |
| 2–16                       | OR        | 0.5<br>(0.3–0.8)           | 0.3<br>(0.2–0.3)        | 0.6<br>(0.5–0.7)         | 0.2<br>(0.2–0.2)         | 0.9<br>(0.7–1.1)         | 1.8<br>(1.4–2.4)        | 0.4<br>(0.4–0.5)         | 0.3<br>(0.3–0.4)        | 0.3<br>(0.2–0.3)        |
| Private patient            | OR        | 0.8<br>(0.6–1.0)           | 0.7<br>(0.6–0.9)        | 0.9<br>(0.7–1.0)         | 0.5<br>(0.4–0.6)         | 1.5<br>(1.3–1.8)         | 1.3<br>(1.1–1.4)        | 0.5<br>(0.4–0.6)         | 0.6<br>(0.5–0.7)        | 0.6<br>(0.6–0.7)        |
| Financial year             | OR        | 1.2<br>(1.1–1.2)           | 1.1<br>(1.0–1.1)        | 1.1<br>(1.0–1.1)         | 0.9<br>(0.9–0.9)         | 1.0<br>(0.9–1.0)         | 0.9<br>(0.9–0.9)        | 1.1<br>(1.0–1.1)         | 1.0<br>(0.9–1.0)        | 1.0<br>(1.0–1.1)        |
| <b>Hospital level</b>      |           |                            |                         |                          |                          |                          |                         |                          |                         |                         |
| Peer group                 |           |                            |                         |                          |                          |                          |                         |                          |                         |                         |
| B                          | OR        | 0.3<br>(0.1–1.0)           | 1.0<br>(0.5–2.0)        | 0.5<br>(0.3–0.8)         | 1.1<br>(0.8–1.4)         | 0.8<br>(0.6–1.0)         | 0.8<br>(0.5–1.1)        | 0.4<br>(0.2–0.8)         | 1.2<br>(0.8–1.7)        | 1.3<br>(0.9–1.8)        |
|                            | IOR80     | 0.0–2.3                    | 0.4–3.0                 | 0.3–0.8                  | 0.1–11                   | 0.6–1.0                  | 0.2–2.5                 | 0.2–0.7                  | 0.5–3.1                 | 0.4–4.2                 |
| C1                         | OR        | 0.3<br>(0.1–1.0)           |                         |                          | 2.6<br>(1.2–5.5)         |                          | 1.2<br>(0.7–2.0)        |                          | 1.3<br>(0.8–2.1)        | 0.7<br>(0.4–1.1)        |
|                            | IOR80     | 0.0–2.1                    |                         |                          | 0.3–26                   |                          | 0.4–3.8                 |                          | 0.5–3.4                 | 0.2–2.3                 |

|                                            |       |                  |                  |                   |                  |                   |                  |                  |                  |                   |
|--------------------------------------------|-------|------------------|------------------|-------------------|------------------|-------------------|------------------|------------------|------------------|-------------------|
| C2                                         | OR    | 0.1<br>(0.0–0.6) |                  |                   | 3.7<br>(1.7–7.8) |                   | 0.6<br>(0.4–1.1) |                  | 1.2<br>(0.7–2.0) | 0.9<br>(0.6–1.6)  |
|                                            | IOR80 | 0.0–0.9          |                  |                   | 0.4–37           |                   | 0.2–2.0          |                  | 0.4–3.2          | 0.3–3.1           |
| D1a                                        | OR    |                  |                  |                   | 5.1<br>(1.8–16)  |                   |                  |                  | 1.3<br>(0.6–2.9) | 0.7<br>(0.3–1.3)  |
|                                            | IOR80 |                  |                  |                   | 0.5–52           |                   |                  |                  | 0.5–3.4          | 0.2–2.2           |
| D1b                                        | OR    |                  |                  |                   |                  |                   |                  |                  | 0.9<br>(0.3–3.1) | 0.6<br>(0.2–2.0)  |
|                                            | IOR80 |                  |                  |                   |                  |                   |                  |                  | 0.4–2.4          | 0.2–2.0           |
| Procedure as<br>proportion total<br>volume | OR    | 1.3<br>(1.2–1.4) | 5.9<br>(3.3–11)  | 4.0<br>(2.7–5.8)  | 1.1<br>(1.1–1.1) | 4.3<br>(3.1–6.1)  | 1.0<br>(1.0–1.0) | 1.5<br>(1.3–1.7) | 1.1<br>(1.1–1.1) | 1.1<br>(1.1–1.1)  |
|                                            | IOR80 | 0.2–9.4          | 2.0–17           | 2.3–6.7           | 0.1–11           | 3.4–5.5           | 0.3–3.2          | 0.8–2.6          | 0.4–2.8          | 0.3–3.6           |
| <i>Variance</i>                            |       | 1.2<br>(0.5–2.7) | 0.4<br>(0.1–0.8) | 0.1<br>(0.0–0.3)  | 1.6<br>(1.1–2.5) | 0.0<br>(0.0–0.1)  | 0.4<br>(0.3–0.7) | 0.1<br>(0.0–0.3) | 0.3<br>(0.2–0.5) | 0.4<br>(0.3–0.7)  |
| <i>VPC</i>                                 |       | 21               | 9.4              | 2.4               | 31               | 0.5               | 11               | 2.6              | 7.4              | 11                |
| <i>MOR</i>                                 |       | 2.9 (2.0–4.8)    | 1.8 (1.4–2.3)    | 1.3 (1.2–<br>1.7) | 3.4 (2.7–4.5)    | 1.1 (1.0–<br>1.3) | 1.9 (1.6–2.2)    | 1.3 (1.2–1.7)    | 1.7 (1.5–1.9)    | 1.9 (1.7–<br>2.2) |
| <b>LHD level</b>                           |       |                  |                  |                   |                  |                   |                  |                  |                  |                   |
| Rural                                      | OR    | 3.2<br>(0.8–15)  | 1.1<br>(0.4–2.6) | 0.8<br>(0.5–1.5)  | 2.0<br>(0.7–5.0) | 0.9<br>(0.6–1.3)  | 1.1<br>(0.6–2.0) | 0.7<br>(0.4–1.1) | 1.3<br>(0.9–2.0) | 1.3<br>(0.7–2.3)  |
|                                            | IOR80 | 0.5–21           | 0.6–1.7          |                   | 0.8–4.7          | 0.8–1.1           | 0.6–2.4          |                  | 0.9–1.9          | 0.7–2.5           |
| <i>Variance</i>                            |       | 1.1<br>(0.1–4.5) | 0.1<br>(0.0–0.6) |                   | 0.2<br>(0.0–1.3) | 0.0<br>(0.0–0.1)  | 0.2<br>(0.0–0.5) |                  | 0.0<br>(0.0–0.2) | 0.1<br>(0.0–0.5)  |
| <i>VPC</i>                                 |       | 19               | 1.9              |                   | 4.5              | 0.3               | 4.1              |                  | 1.0              | 3.2               |
| <i>MOR</i>                                 |       | 2.7 (1.3–7.6)    | 1.3 (1.0–2.1)    |                   | 1.6 (1.0–2.9)    | 1.1 (1.0–<br>1.3) | 1.5 (1.1–2.0)    |                  | 1.2 (1.0–1.6)    | 1.4 (1.1–<br>1.9) |
| <b>SLA level</b>                           |       |                  |                  |                   |                  |                   |                  |                  |                  |                   |
| IRSAD quintile                             |       |                  |                  |                   |                  |                   |                  |                  |                  |                   |
| 2                                          | OR    | 0.9<br>(0.6–1.2) | 1.0<br>(0.7–1.5) | 0.9<br>(0.7–1.3)  | 1.2<br>(1.0–1.4) | 1.0<br>(0.7–1.3)  | 1.0<br>(0.9–1.1) | 1.1<br>(0.8–1.5) | 1.1<br>(0.8–1.4) | 1.0<br>(0.8–1.2)  |
|                                            | IOR80 | 0.4–1.9          | 0.6–1.8          | 0.5–1.8           | 0.7–1.9          | 0.5–1.7           | 0.8–1.3          | 0.5–2.6          | 0.5–2.2          | 0.5–1.8           |
| 3                                          | OR    | 0.8              | 1.1              | 1.0               | 1.1              | 0.8               | 1.0              | 0.9              | 1.2              | 1.0               |

|                                     |       |               |               |               |               |               |               |               |               |               |
|-------------------------------------|-------|---------------|---------------|---------------|---------------|---------------|---------------|---------------|---------------|---------------|
|                                     |       | (0.6–1.1)     | (0.7–1.6)     | (0.7–1.4)     | (0.9–1.3)     | (0.6–1.2)     | (0.9–1.1)     | (0.6–1.3)     | (0.9–1.5)     | (0.8–1.3)     |
|                                     | IOR80 | 0.4–1.7       | 0.6–1.9       | 0.5–2.0       | 0.7–1.8       | 0.5–1.5       | 0.8–1.3       | 0.4–2.1       | 0.6–2.4       | 0.6–1.9       |
| 4                                   | OR    | 0.9           | 1.0           | 0.9           | 1.1           | 1.0           | 1.1           | 0.6           | 1.1           | 1.0           |
|                                     |       | (0.6–1.4)     | (0.7–1.5)     | (0.6–1.2)     | (0.9–1.4)     | (0.7–1.4)     | (0.9–1.2)     | (0.4–0.9)     | (0.8–1.4)     | (0.8–1.2)     |
|                                     | IOR80 | 0.4–2.0       | 0.6–1.7       | 0.4–1.6       | 0.7–1.9       | 0.5–1.7       | 0.8–1.4       | 0.3–1.5       | 0.5–2.2       | 0.5–1.8       |
| 5                                   | OR    | 0.6           | 0.7           | 0.9           | 1.3           | 1.1           | 1.1           | 0.7           | 1.0           | 1.0           |
|                                     |       | (0.4–0.9)     | (0.4–1.1)     | (0.6–1.4)     | (1.0–1.6)     | (0.7–1.6)     | (0.9–1.2)     | (0.5–1.1)     | (0.7–1.4)     | (0.7–1.3)     |
|                                     | IOR80 | 0.3–1.2       | 0.4–1.2       | 0.5–1.7       | 0.8–2.1       | 0.6–1.9       | 0.8–1.4       | 0.3–1.8       | 0.5–2.1       | 0.5–1.8       |
| Remoteness category                 |       |               |               |               |               |               |               |               |               |               |
| Inner Regional                      | OR    | 1.5           | 0.9           | 1.5           | 0.7           | 1.4           | 1.2           | 2.1           | 1.0           | 1.3           |
|                                     |       | (1.1–2.0)     | (0.6–1.3)     | (1.1–2.0)     | (0.6–0.8)     | (0.9–2.0)     | (1.0–1.4)     | (1.6–2.7)     | (0.8–1.3)     | (1.0–1.6)     |
|                                     | IOR80 | 0.7–3.2       | 0.5–1.6       | 0.8–2.9       | 0.4–1.2       | 0.8–2.4       | 0.9–1.5       | 0.9–5.1       | 0.5–2.1       | 0.7–2.3       |
| Outer Regional                      | OR    | 1.3           | 1.1           | 2.7           | 0.6           | 1.6           | 1.1           | 2.7           | 1.5           | 1.6           |
|                                     |       | (0.8–2.2)     | (0.6–1.8)     | (1.7–4.5)     | (0.5–0.8)     | (0.9–3.0)     | (0.9–1.4)     | (1.9–4.0)     | (1.1–2.2)     | (1.2–2.2)     |
|                                     | IOR80 | 0.6–2.9       | 0.6–1.9       | 1.4–5.3       | 0.4–1.0       | 0.9–2.9       | 0.9–1.4       | 1.1–6.6       | 0.7–3.2       | 0.9–3.1       |
| Remote/Very remote                  | OR    |               |               |               | 0.8           |               | 1.1           | 3.1           | 0.7           | 1.4           |
|                                     |       |               |               |               | (0.5–1.4)     |               | (0.7–1.7)     | (0.9–9.1)     | (0.3–1.6)     | (0.8–2.7)     |
|                                     | IOR80 |               |               |               | 0.5–1.4       |               | 0.9–1.4       | 1.3–7.5       | 0.3–1.4       | 0.8–2.6       |
| Population prevalence of indication | OR    | 0.5           | 1.0           | 0.9           | 1.0           | 1.1           |               | 0.8           | 1.0           | 1.0           |
|                                     |       | (0.3–0.9)     | (0.5–2.0)     | (0.6–1.4)     | (0.9–1.1)     | (0.9–1.2)     |               | (0.7–0.9)     | (0.9–1.0)     | (0.9–1.0)     |
|                                     | IOR80 | 0.2–1.1       | 0.6–1.8       | 0.5–1.7       | 0.6–1.7       | 0.6–1.9       |               | 0.3–2.0       | 0.5–2.0       | 0.5–1.8       |
| Variance                            |       | 0.2           | 0.1           | 0.1           | 0.1           | 0.1           | 0.0           | 0.2           | 0.2           | 0.1           |
|                                     |       | (0.1–0.3)     | (0.0–0.3)     | (0.1–0.3)     | (0.1–0.1)     | (0.0–0.2)     | (0.0–0.0)     | (0.1–0.4)     | (0.1–0.2)     | (0.1–0.2)     |
| VPC                                 |       | 3.2           | 2.5           | 3.9           | 1.5           | 3.0           | 0.5           | 6.5           | 4.3           | 2.9           |
| MOR                                 |       | 1.5 (1.3–1.7) | 1.3 (1.1–1.6) | 1.4 (1.3–1.6) | 1.3 (1.2–1.4) | 1.4 (1.2–1.5) | 1.1 (1.1–1.2) | 1.6 (1.5–1.8) | 1.5 (1.4–1.6) | 1.4 (1.3–1.5) |

\* Age groups differ between services and are set at approximate quartiles for the cohort for each service. Individual age groups are specified before the parameter estimates. Reference categories were selected according to what seemed most appropriate for each procedure. ERCP, endoscopic retrograde cholangiopancreatography. EVAR, endovascular repair of abdominal aortic aneurysm. IOR80, 80% interval odds ratio. IRSAD, Index of Relative Socioeconomic Advantage and Disadvantage. LHD, Local Health District. MOR, median odds ratio. OR, odds ratio. SLA, Statistical Local Area. VPC, variance partition coefficient.

Supplementary Figure 1: ROC curves for Models 1–5 for each service, broader definitions of low-value care

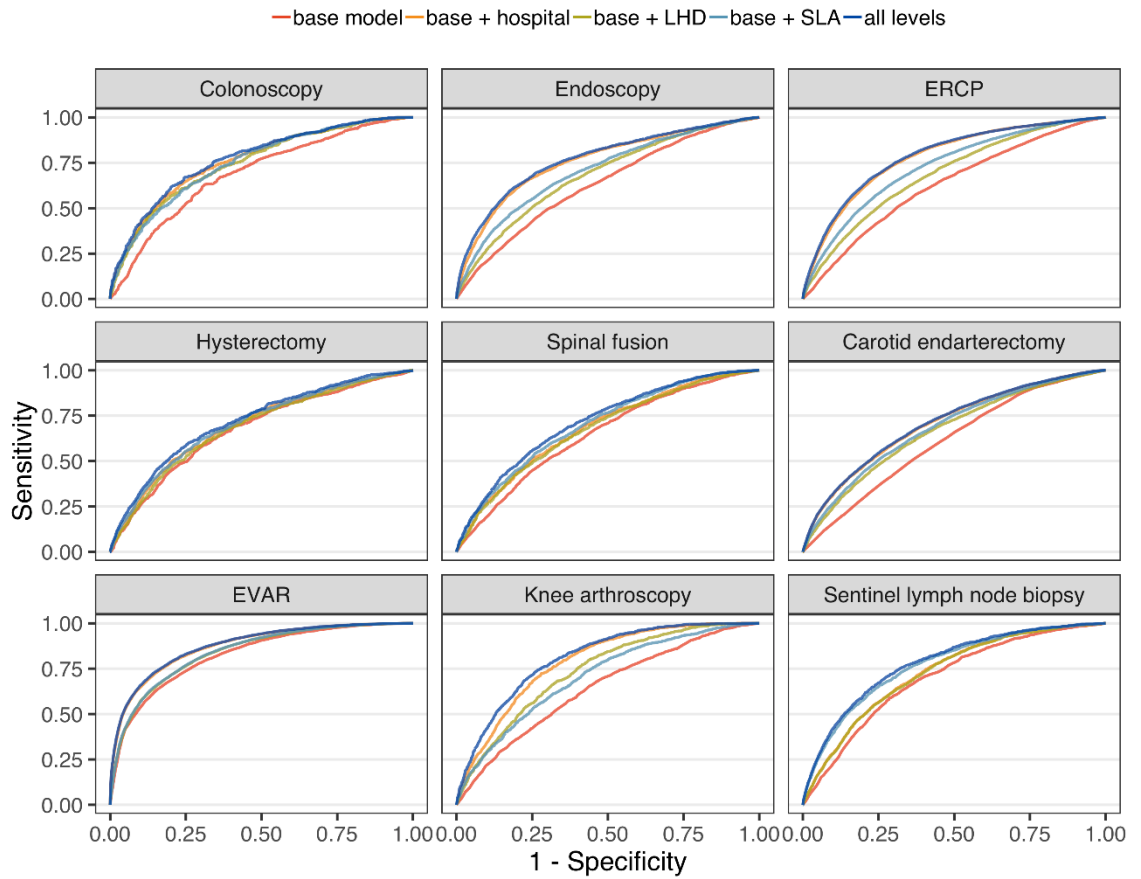

ERCP, endoscopic retrograde cholangiopancreatography. EVAR, endovascular repair of abdominal aortic aneurysm. LHD, Local Health District. SLA, Statistical Local Area.

Supplementary Figure 2: Proportion of residual variation at the hospital, Local Health District, and Statistical Local Area of residence levels, broader definitions of low-value care

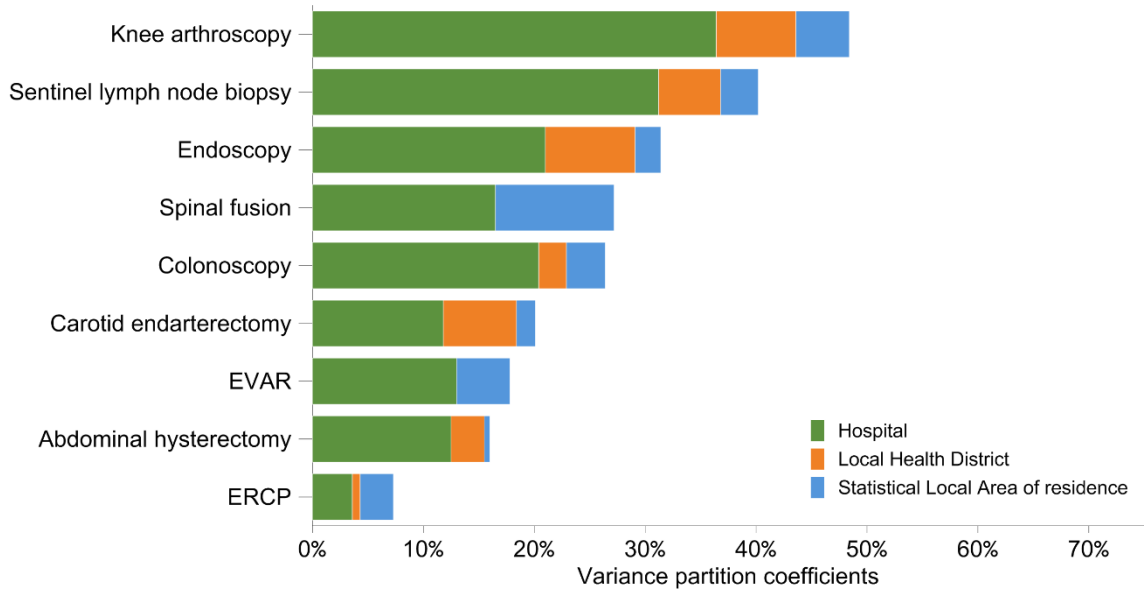

The total length of the bars shows the total proportion of variation explained by hospital, Local Health District (LHD), and Statistical Local Area. The remaining residual variation is attributable to unmeasured characteristics of the individual episode. LHD was not included in the models for EVAR and spinal fusion because of the small number of hospitals performing these procedures. ERCP, endoscopic retrograde cholangiopancreatography. EVAR, endovascular repair of abdominal aortic aneurysm.

Supplementary Figure 3: Median odds ratios, broader definitions of low-value care

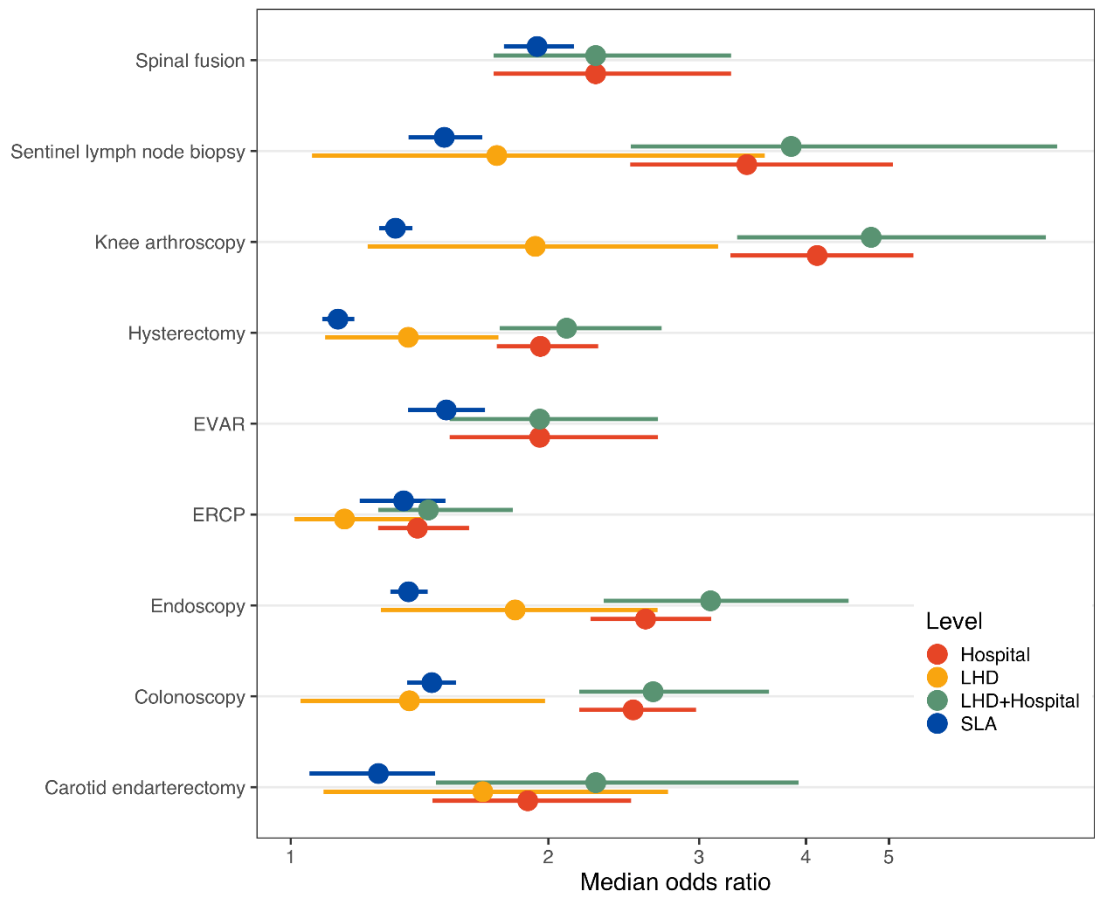

EVAR, endovascular repair of aortic abdominal aneurysm. ERCP, endoscopic retrograde cholangiopancreatography. LHD, Local Health District. SLA, Statistical Local Area.
